# Supplementary material
Source: HighWire-hosted journal article supplement (http://dmd.aspetjournals.org/highwire/filestream/75230/field_highwire_adjunct_files/0/DMD39_5075_1_supp_36800_qb4y14_convrt.pdf)
Supplement: DMD39_5075_1_supp_36800_qb4y14_convrt.pdf [file DMD39_5075_1_supp_36800_qb4y14_convrt.pdf]

## Drug Metabolism and Disposition

## Impact of Microbiome on Hepatic Metabolizing Enzymes and Transporters in Mice during Pregnancy

Lyrialle W. Han, Lu Wang, Yuanyuan Shi, Joseph L. Dempsey, Olesya V. Pershutkina, Moumita Dutta, Theo K. Bammler, Julia Y. Cui, and Qingcheng Mao

**Supplemental Table S1. Surrogate peptides of cytochrome P450s and transporters and their MS/MS parameters for detection**

| Protein Name | Surrogate Peptide | Peptide Type | Parent Ion (m/z) | Fragment Ion (m/z) |
|--------------|-------------------|--------------|------------------|--------------------|
| Cyp2c37      | DICQSFTNLSK       | Light        | 656.8            | 796.4              |
| Cyp2c37      | DICQSFTNLSK       | Light        | 656.8            | 709.4              |
| Cyp2c50      | YAILLLLK          | Light        | 473.8            | 712.5              |
| Cyp2c50      | YAILLLLK          | Light        | 473.8            | 599.4              |
| Cyp2c54      | ATNGMGIGFSNGSVWK  | Light        | 813.4            | 1151.6             |
| Cyp2c54      | ATNGMGIGFSNGSVWK  | Light        | 813.4            | 1094.6             |
| Cyp2c54      | ESLDVTIPR         | Light        | 343.9            | 407.2              |
| Cyp2c54      | ESLDVTIPR         | Light        | 343.9            | 350.7              |
| Cyp2d22      | MPYTNAVIHEVQR     | Light        | 390.2            | 476.3              |
| Cyp2d22      | MPYTNAVIHEVQR     | Light        | 390.2            | 476.2              |
| Cyp2d40      | GNPESSFNEANLR     | Light        | 717.8            | 950.5              |
| Cyp2d40      | GNPESSFNEANLR     | Light        | 717.8            | 863.4              |
| Cyp3a11      | ALLSPTFTSGK       | Light        | 561.3            | 937.5              |
| Cyp3a11      | ALLSPTFTSGK       | Light        | 561.3            | 824.4              |
| Cyp3a11      | ALLSPTFTSGK       | Light        | 561.3            | 737.4              |
| Cyp3a16      | QDFFPVGIMSK       | Light        | 423.5            | 731.4              |
| Cyp3a16      | QDFFPVGIMSK       | Light        | 423.5            | 366.2              |
| Cyp3a41      | VDFLQLMMNAHNSK    | Light        | 441.2            | 599.3              |
| Cyp3a41      | VDFLQLMMNAHNSK    | Light        | 441.2            | 516.6              |
| Cyp3a41      | LQEEIDETLPNK      | Light        | 476.9            | 701.4              |
| Cyp3a41      | LQEEIDETLPNK      | Light        | 476.9            | 572.3              |
| Cyp3a41      | LQEEIDETLPNK      | Light        | 476.9            | 120.1              |
| BSA          | LVNELTEFAK        | Light        | 582.3            | 708.4              |
| BSA          | LVNELTEFAK        | Light        | 582.3            | 951.5              |
| BSA          | AEFVEVTK          | Light        | 461.7            | 722.4              |
| BSA          | AEFVEVTK          | Light        | 461.7            | 347.2              |
| BSA          | AEFVEVTK          | Heavy        | 465.8            | 859.5              |
| BSA          | AEFVEVTK          | Heavy        | 465.8            | 730.4              |
| BSA          | AEFVEVTK          | Heavy        | 465.8            | 583.4              |
| BSA          | AEFVEVTK          | Heavy        | 465.8            | 484.3              |
| Abcc3        | HIFDQVIGPEGLAGK   | Light        | 840.5            | 1429.8             |
| Abcc3        | HIFDQVIGPEGLAGK   | Light        | 840.5            | 1282.7             |

**DMD-AR-2020-000039**

|         |                           |       |       |        |
|---------|---------------------------|-------|-------|--------|
| Abcc3   | HIFDQVIGPEGVLAGK          | Heavy | 844.5 | 1437.8 |
| Abcc3   | HIFDQVIGPEGVLAGK          | Heavy | 844.5 | 1290.7 |
| Abcc3   | HIFDQVIGPEGVLAGK          | Heavy | 844.5 | 1175.7 |
| Abcc3   | HIFDQVIGPEGVLAGK          | Heavy | 844.5 | 948.6  |
| Abcc3   | HIFDQVIGPEGVLAGK          | Heavy | 844.5 | 778.5  |
| Abcb11  | LSTALSGLLLGFYR            | Light | 504.3 | 655.4  |
| Abcb11  | LSTALSGLLLGFYR            | Light | 504.3 | 699.3  |
| Abcb11  | LSTALSGLLLGFYR            | Light | 504.3 | 605.4  |
| Abcb11  | FYDPCEGMVTLDGHDIR         | Light | 507.0 | 825.4  |
| Abcb11  | FYDPCEGMVTLDGHDIR         | Light | 507.0 | 712.3  |
| Abcb11  | FYDPCEGMVTLDGHDIR         | Light | 507.0 | 597.3  |
| Abcg2   | GEKPVIENTSEFYINSAIYGETK   | Light | 867.8 | 982.5  |
| Abcg2   | GEKPVIENTSEFYINSAIYGETK   | Light | 867.8 | 989.5  |
| Mdr1a   | ATVSASHIIR                | Light | 527.8 | 983.6  |
| Mdr1a   | ATVSASHIIR                | Light | 527.8 | 783.4  |
| Mdr1b   | GIYFSMVQAGAK              | Light | 636.3 | 791.4  |
| Mdr1b   | GIYFSMVQAGAK              | Light | 636.3 | 704.4  |
| Slc1a1  | YLEQQYGK                  | Light | 514.8 | 623.3  |
| Slc1a1  | YLEQQYGK                  | Light | 514.8 | 662.3  |
| Slc1a1  | YLEQQYGK                  | Heavy | 518.8 | 873.5  |
| Slc1a1  | YLEQQYGK                  | Heavy | 518.8 | 631.3  |
| Slc1a1  | YLEQQYGK                  | Heavy | 518.8 | 662.3  |
| Slc22a2 | YEVDWNQSTLDCVDPLSSLAANR   | Light | 885.1 | 1043.5 |
| Slc22a2 | YEVDWNQSTLDCVDPLSSLAANR   | Light | 885.1 | 1131.5 |
| Slc22a2 | YEVDWNQSTLDCVDPLSSLAANR   | Heavy | 889.1 | 1043.5 |
| Slc22a2 | YEVDWNQSTLDCVDPLSSLAANR   | Heavy | 889.1 | 928.5  |
| Slc22a2 | LNPSFLDLVR                | Light | 587.3 | 946.5  |
| Slc22a2 | LNPSFLDLVR                | Light | 587.3 | 473.8  |
| Slc22a2 | LNPSFLDLVR                | Heavy | 592.3 | 956.5  |
| Slc22a2 | LNPSFLDLVR                | Heavy | 592.3 | 859.5  |
| Slc22a2 | LNPSFLDLVR                | Heavy | 592.3 | 772.4  |
| Slc22a2 | LNPSFLDLVR                | Heavy | 592.3 | 625.3  |
| Slc22a2 | LNPSFLDLVR                | Heavy | 592.3 | 478.8  |
| Slc22a7 | WLLLAATLPCVPGIISIWWVPESAR | Light | 950.2 | 1343.7 |
| Slc22a7 | WLLLAATLPCVPGIISIWWVPESAR | Light | 950.2 | 1230.6 |
| Slc1a4  | MYDINSFR                  | Light | 349.2 | 409.2  |
| Slc1a4  | MYDINSFR                  | Light | 349.2 | 457.7  |
| Slc1a4  | MYDINSFR                  | Light | 349.2 | 376.2  |

**Supplemental Table S2. Pregnancy and microbiome alter the mRNA expression of DMETs in female C57BL/6 livers.** This list of genes was generated by comparing mRNA expression in groups between CVP and CVNP, GFP and GFNP, GFNP and CVNP, and GFP and CVP.

| Gene Symbol       | CVP vs. CVNP |        | GFP vs. GFNP |        | GFNP vs. CVNP |       | GFP vs. CVP |        |
|-------------------|--------------|--------|--------------|--------|---------------|-------|-------------|--------|
|                   | Fold Change  | FDR    | Fold Change  | FDR    | Fold Change   | FDR   | Fold Change | FDR    |
| <i>Cyp11a1</i>    | 1.0          | 1.000  | 0.4          | 0.505  | 1.6           | 1.000 | 0.6         | 0.968  |
| <i>Cyp11b1</i>    | 1.0          | 1.000  | 0.4          | 0.628  | 2.8           | 1.000 | 1.0         | 1.000  |
| <i>Cyp17a1</i>    | 1.7          | 0.280  | 2.9          | 0.010  | 0.9           | 1.000 | 1.6         | 0.704  |
| <i>Cyp1a1</i>     | 0.4          | 0.088  | 0.7          | 0.570  | 1.0           | 1.000 | 1.8         | 0.635  |
| <i>Cyp1a2</i>     | 0.6          | 0.322  | 0.8          | 0.594  | 1.0           | 1.000 | 1.2         | 0.930  |
| <i>Cyp1b1</i>     | 1.1          | 0.959  | 1.9          | 0.462  | 1.0           | 1.000 | 1.7         | 0.859  |
| <i>Cyp20a1</i>    | 0.9          | 0.702  | 0.9          | 0.738  | 0.9           | 1.000 | 0.9         | 0.941  |
| <i>Cyp21a1</i>    | 2.5          | 0.729  | 0.7          | 0.896  | 2.7           | 1.000 | 0.8         | 1.000  |
| <i>Cyp21a2-ps</i> | 0.7          | 0.797  | 0.9          | 0.932  | 0.8           | 1.000 | 1.0         | 1.000  |
| <i>Cyp24a1</i>    | 1.0          | 1.000  | 1.0          | 1.000  | 1.0           | 1.000 | 1.0         | 1.000  |
| <i>Cyp26a1</i>    | 3.2          | 0.076  | 4.2          | 0.020  | 0.9           | 1.000 | 1.1         | 0.996  |
| <i>Cyp26b1</i>    | 0.0          | <0.001 | 0.1          | <0.001 | 1.9           | 0.982 | 5.0         | 0.289  |
| <i>Cyp26c1</i>    | 0.8          | 0.920  | 0.7          | 0.814  | 0.8           | 1.000 | 0.7         | 0.969  |
| <i>Cyp27a1</i>    | 0.5          | 0.077  | 0.6          | 0.121  | 0.7           | 1.000 | 0.8         | 0.857  |
| <i>Cyp2a12</i>    | 1.0          | 0.975  | 1.3          | 0.641  | 1.0           | 1.000 | 1.4         | 0.824  |
| <i>Cyp2a21-ps</i> | 1.6          | 0.693  | 1.9          | 0.484  | 1.1           | 1.000 | 1.3         | 0.965  |
| <i>Cyp2a22</i>    | 0.7          | 0.466  | 0.7          | 0.531  | 1.8           | 0.811 | 2.0         | 0.467  |
| <i>Cyp2a4</i>     | 2.2          | 0.052  | 1.5          | 0.323  | 0.7           | 1.000 | 0.5         | 0.413  |
| <i>Cyp2a5</i>     | 0.6          | 0.381  | 0.6          | 0.436  | 1.1           | 1.000 | 1.2         | 0.985  |
| <i>Cyp2ab1</i>    | 0.5          | 0.709  | 0.6          | 0.813  | 1.2           | 1.000 | 1.7         | 0.969  |
| <i>Cyp2b10</i>    | 1.2          | 0.828  | 0.8          | 0.837  | 1.0           | 1.000 | 0.6         | 0.840  |
| <i>Cyp2b13</i>    | 0.1          | <0.001 | 0.3          | <0.001 | 1.2           | 1.000 | 5.3         | <0.001 |
| <i>Cyp2b9</i>     | 0.6          | 0.136  | 1.0          | 0.992  | 0.8           | 1.000 | 1.3         | 0.799  |
| <i>Cyp2c23</i>    | 0.7          | 0.504  | 0.9          | 0.874  | 1.1           | 1.000 | 1.4         | 0.768  |
| <i>Cyp2c29</i>    | 0.7          | 0.261  | 0.7          | 0.241  | 1.4           | 0.953 | 1.4         | 0.639  |
| <i>Cyp2c37</i>    | 0.3          | 0.002  | 0.6          | 0.152  | 1.0           | 1.000 | 1.8         | 0.401  |
| <i>Cyp2c38</i>    | 0.4          | 0.007  | 1.0          | 0.965  | 1.3           | 1.000 | 3.0         | 0.013  |
| <i>Cyp2c39</i>    | 1.0          | 0.983  | 2.4          | 0.022  | 1.1           | 1.000 | 2.7         | 0.154  |
| <i>Cyp2c40</i>    | 0.6          | 0.141  | 0.9          | 0.900  | 0.8           | 1.000 | 1.2         | 0.902  |
| <i>Cyp2c50</i>    | 0.2          | <0.001 | 0.5          | 0.001  | 1.0           | 1.000 | 2.0         | 0.066  |
| <i>Cyp2c54</i>    | 0.4          | 0.001  | 0.8          | 0.561  | 1.0           | 1.000 | 2.2         | 0.074  |
| <i>Cyp2c55</i>    | 0.5          | 0.216  | 0.1          | <0.001 | 2.8           | 0.319 | 0.8         | 0.974  |
| <i>Cyp2c67</i>    | 0.4          | 0.012  | 0.6          | 0.279  | 1.4           | 1.000 | 2.3         | 0.238  |
| <i>Cyp2c68</i>    | 0.7          | 0.527  | 1.1          | 0.930  | 0.9           | 1.000 | 1.3         | 0.841  |
| <i>Cyp2c69</i>    | 1.0          | 0.998  | 2.6          | 0.020  | 0.6           | 0.982 | 1.6         | 0.708  |
| <i>Cyp2c70</i>    | 1.9          | 0.317  | 2.3          | 0.162  | 0.9           | 1.000 | 1.0         | 1.000  |

|                   |      |        |       |        |     |       |     |       |
|-------------------|------|--------|-------|--------|-----|-------|-----|-------|
| <i>Cyp2d10</i>    | 0.8  | 0.540  | 1.2   | 0.566  | 0.9 | 1.000 | 1.4 | 0.729 |
| <i>Cyp2d12</i>    | 0.9  | 0.965  | 0.5   | 0.204  | 1.4 | 1.000 | 0.8 | 0.912 |
| <i>Cyp2d22</i>    | 0.7  | 0.249  | 0.7   | 0.250  | 1.2 | 1.000 | 1.2 | 0.884 |
| <i>Cyp2d26</i>    | 0.8  | 0.658  | 1.2   | 0.711  | 1.0 | 1.000 | 1.5 | 0.689 |
| <i>Cyp2d34</i>    | 1.0  | 0.993  | 0.7   | 0.641  | 1.3 | 1.000 | 1.0 | 1.000 |
| <i>Cyp2d35-ps</i> | 1.6  | 0.742  | 0.9   | 0.934  | 2.2 | 1.000 | 1.2 | 0.995 |
| <i>Cyp2d36-ps</i> | 2.1  | 0.280  | 2.3   | 0.175  | 1.0 | 1.000 | 1.1 | 1.000 |
| <i>Cyp2d37-ps</i> | 1.6  | 0.342  | 1.2   | 0.754  | 1.0 | 1.000 | 0.8 | 0.898 |
| <i>Cyp2d38-ps</i> | 2.2  | 0.088  | 1.8   | 0.241  | 1.1 | 1.000 | 0.9 | 0.977 |
| <i>Cyp2d40</i>    | 3.9  | <0.001 | 5.4   | <0.001 | 0.7 | 1.000 | 1.0 | 1.000 |
| <i>Cyp2d41-ps</i> | 1.2  | 0.831  | 0.9   | 0.907  | 1.0 | 1.000 | 0.7 | 0.904 |
| <i>Cyp2d9</i>     | 0.3  | 0.025  | 0.2   | 0.002  | 1.8 | 1.000 | 1.1 | 1.000 |
| <i>Cyp2e1</i>     | 0.4  | 0.141  | 0.7   | 0.474  | 1.1 | 1.000 | 1.6 | 0.799 |
| <i>Cyp2f2</i>     | 0.6  | 0.182  | 0.8   | 0.507  | 0.7 | 1.000 | 0.9 | 0.977 |
| <i>Cyp2g1</i>     | 2.8  | 0.047  | 3.6   | 0.010  | 0.6 | 1.000 | 0.8 | 0.964 |
| <i>Cyp2j5</i>     | 0.8  | 0.627  | 0.9   | 0.901  | 1.0 | 1.000 | 1.1 | 0.985 |
| <i>Cyp2j6</i>     | 0.8  | 0.543  | 1.1   | 0.808  | 0.9 | 1.000 | 1.3 | 0.774 |
| <i>Cyp2j9</i>     | 0.4  | 0.153  | 0.4   | 0.103  | 0.8 | 1.000 | 0.7 | 0.894 |
| <i>Cyp2r1</i>     | 1.0  | 0.962  | 1.2   | 0.622  | 0.6 | 0.439 | 0.7 | 0.722 |
| <i>Cyp2s1</i>     | 0.3  | 0.222  | 4.5   | 0.072  | 0.5 | 1.000 | 7.1 | 0.238 |
| <i>Cyp2u1</i>     | 0.8  | 0.720  | 0.9   | 0.902  | 0.7 | 1.000 | 0.8 | 0.869 |
| <i>Cyp39a1</i>    | 0.4  | 0.031  | 0.3   | 0.017  | 1.0 | 1.000 | 0.9 | 0.999 |
| <i>Cyp3a11</i>    | 0.6  | 0.290  | 0.3   | 0.005  | 0.6 | 0.953 | 0.3 | 0.131 |
| <i>Cyp3a13</i>    | 1.0  | 1.000  | 1.6   | 0.478  | 0.9 | 1.000 | 1.5 | 0.874 |
| <i>Cyp3a16</i>    | 20.6 | 0.001  | 128.0 | <0.001 | 0.2 | 0.578 | 1.4 | 0.953 |
| <i>Cyp3a25</i>    | 0.7  | 0.235  | 0.8   | 0.374  | 0.7 | 0.873 | 0.8 | 0.762 |
| <i>Cyp3a41a</i>   | 4.8  | 0.047  | 10.8  | 0.002  | 0.6 | 1.000 | 1.4 | 0.941 |
| <i>Cyp3a41b</i>   | 74.2 | <0.001 | 181.7 | <0.001 | 0.5 | 1.000 | 1.3 | 0.989 |
| <i>Cyp3a44</i>    | 14.3 | <0.001 | 30.5  | <0.001 | 0.8 | 1.000 | 1.7 | 0.816 |
| <i>Cyp3a59</i>    | 1.4  | 0.352  | 1.1   | 0.802  | 0.7 | 0.953 | 0.6 | 0.321 |
| <i>Cyp3a63-ps</i> | 5.1  | 0.047  | 8.5   | 0.007  | 0.9 | 1.000 | 1.5 | 0.926 |
| <i>Cyp46a1</i>    | 0.6  | 0.547  | 0.4   | 0.117  | 1.0 | 1.000 | 0.6 | 0.816 |
| <i>Cyp4a10</i>    | 0.7  | 0.494  | 0.8   | 0.721  | 1.2 | 1.000 | 1.4 | 0.782 |
| <i>Cyp4a12a</i>   | 1.0  | 1.000  | 0.2   | 0.239  | 1.5 | 1.000 | 0.3 | 0.756 |
| <i>Cyp4a14</i>    | 0.4  | 0.021  | 0.3   | 0.002  | 1.2 | 1.000 | 0.9 | 0.958 |
| <i>Cyp4a31</i>    | 4.6  | <0.001 | 5.3   | <0.001 | 1.1 | 1.000 | 1.3 | 0.909 |
| <i>Cyp4a32</i>    | 0.6  | 0.389  | 1.0   | 0.999  | 1.0 | 1.000 | 1.5 | 0.725 |
| <i>Cyp4b1</i>     | 0.8  | 0.655  | 0.6   | 0.378  | 0.9 | 1.000 | 0.8 | 0.909 |
| <i>Cyp4f13</i>    | 0.6  | 0.042  | 0.8   | 0.329  | 0.8 | 1.000 | 1.1 | 0.987 |
| <i>Cyp4f14</i>    | 0.8  | 0.624  | 1.0   | 0.925  | 0.9 | 1.000 | 1.1 | 0.977 |
| <i>Cyp4f15</i>    | 0.5  | 0.033  | 0.5   | 0.052  | 1.0 | 1.000 | 1.1 | 0.976 |
| <i>Cyp4f16</i>    | 1.0  | 0.976  | 0.7   | 0.364  | 0.9 | 1.000 | 0.6 | 0.553 |
| <i>Cyp4f17</i>    | 0.9  | 0.949  | 1.0   | 0.971  | 0.8 | 1.000 | 0.8 | 0.924 |
| <i>Cyp4f18</i>    | 1.0  | 1.000  | 0.4   | 0.364  | 0.9 | 1.000 | 0.4 | 0.656 |
| <i>Cyp4v3</i>     | 0.6  | 0.095  | 0.9   | 0.697  | 1.0 | 1.000 | 1.4 | 0.703 |
| <i>Cyp4x1</i>     | 1.2  | 0.887  | 1.4   | 0.747  | 0.9 | 1.000 | 1.1 | 1.000 |
| <i>Cyp51</i>      | 0.7  | 0.477  | 1.4   | 0.486  | 0.5 | 0.359 | 0.9 | 0.999 |
| <i>Cyp7a1</i>     | 1.1  | 0.883  | 1.4   | 0.614  | 0.9 | 1.000 | 1.1 | 0.993 |

|                |       |        |       |        |     |       |      |       |
|----------------|-------|--------|-------|--------|-----|-------|------|-------|
| <i>Cyp7b1</i>  | 1.3   | 0.732  | 2.2   | 0.064  | 0.6 | 1.000 | 1.1  | 0.981 |
| <i>Cyp8b1</i>  | 1.4   | 0.751  | 2.9   | 0.123  | 0.2 | 0.145 | 0.4  | 0.546 |
| <i>Ugt1a1</i>  | 0.8   | 0.784  | 1.2   | 0.770  | 1.0 | 1.000 | 1.5  | 0.828 |
| <i>Ugt1a10</i> | 0.9   | 0.977  | 9.6   | 0.004  | 0.2 | 0.439 | 2.4  | 0.689 |
| <i>Ugt1a2</i>  | 0.4   | 0.681  | 0.8   | 0.920  | 0.7 | 1.000 | 1.3  | 1.000 |
| <i>Ugt1a5</i>  | 2.6   | 0.062  | 3.3   | 0.016  | 0.5 | 0.949 | 0.7  | 0.833 |
| <i>Ugt1a6a</i> | 1.3   | 0.698  | 1.3   | 0.674  | 0.9 | 1.000 | 0.9  | 0.976 |
| <i>Ugt1a6b</i> | 0.3   | 0.042  | 0.3   | 0.023  | 1.0 | 1.000 | 0.9  | 0.999 |
| <i>Ugt1a7c</i> | 0.8   | 0.893  | 1.8   | 0.449  | 0.8 | 1.000 | 1.8  | 0.799 |
| <i>Ugt1a8</i>  | 0.3   | 0.496  | 0.2   | 0.230  | 2.9 | 1.000 | 1.6  | 0.974 |
| <i>Ugt1a9</i>  | 0.9   | 0.970  | 1.8   | 0.237  | 1.1 | 1.000 | 2.1  | 0.440 |
| <i>Ugt2a2</i>  | 0.7   | 0.836  | 0.9   | 0.938  | 0.9 | 1.000 | 1.1  | 1.000 |
| <i>Ugt2a3</i>  | 0.8   | 0.364  | 0.9   | 0.869  | 0.9 | 1.000 | 1.1  | 0.943 |
| <i>Ugt2b1</i>  | 0.8   | 0.435  | 0.8   | 0.360  | 1.2 | 1.000 | 1.1  | 0.924 |
| <i>Ugt2b34</i> | 0.8   | 0.709  | 0.9   | 0.884  | 0.9 | 1.000 | 1.1  | 1.000 |
| <i>Ugt2b35</i> | 1.3   | 0.522  | 1.2   | 0.648  | 0.9 | 1.000 | 0.9  | 0.954 |
| <i>Ugt2b36</i> | 1.2   | 0.815  | 1.5   | 0.447  | 1.1 | 1.000 | 1.4  | 0.833 |
| <i>Ugt2b37</i> | 0.7   | 0.800  | 0.8   | 0.876  | 0.5 | 1.000 | 0.5  | 0.797 |
| <i>Ugt2b38</i> | 0.2   | 0.139  | 0.0   | 0.013  | 0.5 | 1.000 | 0.1  | 0.408 |
| <i>Ugt2b5</i>  | 0.9   | 0.841  | 0.9   | 0.799  | 1.1 | 1.000 | 1.0  | 1.000 |
| <i>Ugt3a1</i>  | 0.7   | 0.510  | 1.0   | 0.973  | 1.0 | 1.000 | 1.4  | 0.809 |
| <i>Ugt3a2</i>  | 0.9   | 0.957  | 1.4   | 0.579  | 0.9 | 1.000 | 1.3  | 0.915 |
| <i>Ugt8a</i>   | 0.9   | 0.968  | 1.0   | 0.998  | 2.5 | 1.000 | 2.7  | 0.764 |
| <i>Sult1a1</i> | 0.9   | 0.863  | 1.1   | 0.936  | 1.3 | 1.000 | 1.6  | 0.769 |
| <i>Sult1b1</i> | 1.2   | 0.761  | 1.4   | 0.428  | 1.3 | 1.000 | 1.5  | 0.690 |
| <i>Sult1c2</i> | 1.0   | 0.981  | 2.1   | 0.067  | 0.9 | 1.000 | 1.9  | 0.467 |
| <i>Sult1d1</i> | 0.3   | 0.277  | 0.4   | 0.342  | 1.4 | 1.000 | 1.7  | 0.916 |
| <i>Sult1e1</i> | 0.2   | 0.417  | 0.2   | 0.255  | 9.9 | 0.411 | 13.6 | 0.454 |
| <i>Sult2a1</i> | 1.1   | 0.966  | 1.5   | 0.801  | 0.4 | 1.000 | 0.6  | 0.938 |
| <i>Sult2a2</i> | 0.6   | 0.750  | 0.5   | 0.557  | 1.0 | 1.000 | 0.8  | 0.989 |
| <i>Sult2a3</i> | 0.5   | 0.697  | 0.2   | 0.239  | 1.7 | 1.000 | 0.6  | 0.975 |
| <i>Sult2a5</i> | 0.2   | 0.122  | 0.2   | 0.066  | 1.0 | 1.000 | 0.7  | 0.978 |
| <i>Sult2a7</i> | 0.2   | 0.061  | 0.2   | 0.031  | 0.9 | 1.000 | 0.7  | 0.964 |
| <i>Sult2a8</i> | 1.1   | 0.934  | 1.5   | 0.548  | 0.9 | 1.000 | 1.2  | 0.982 |
| <i>Sult2b1</i> | 3.9   | 0.440  | 2.3   | 0.415  | 8.6 | 0.555 | 5.0  | 0.412 |
| <i>Sult3a1</i> | 3.6   | 0.056  | 12.9  | <0.001 | 0.3 | 0.359 | 1.0  | 1.000 |
| <i>Sult3a2</i> | 53.9  | <0.001 | 226.7 | <0.001 | 0.2 | 0.605 | 0.9  | 1.000 |
| <i>Sult4a1</i> | 287.7 | <0.001 | 3.5   | 0.333  | 5.2 | 1.000 | 0.1  | 0.129 |
| <i>Sult5a1</i> | 0.7   | 0.632  | 0.5   | 0.291  | 0.2 | 0.134 | 0.1  | 0.081 |
| <i>Gsta1</i>   | 7.4   | 0.160  | 0.1   | 0.086  | 9.5 | 0.564 | 0.1  | 0.444 |
| <i>Gsta2</i>   | 0.6   | 0.215  | 0.4   | 0.033  | 2.0 | 0.605 | 1.5  | 0.782 |
| <i>Gsta3</i>   | 0.9   | 0.942  | 1.0   | 0.964  | 0.9 | 1.000 | 1.0  | 1.000 |
| <i>Gsta4</i>   | 0.5   | 0.181  | 0.5   | 0.098  | 1.2 | 1.000 | 1.1  | 0.989 |
| <i>Gstcd</i>   | 1.6   | 0.311  | 1.0   | 0.966  | 1.0 | 1.000 | 0.7  | 0.763 |
| <i>Gstk1</i>   | 0.5   | 0.005  | 0.5   | 0.018  | 1.1 | 1.000 | 1.2  | 0.901 |
| <i>Gstm1</i>   | 1.0   | 0.984  | 0.7   | 0.498  | 1.1 | 1.000 | 0.7  | 0.838 |
| <i>Gstm2</i>   | 1.8   | 0.041  | 1.4   | 0.248  | 1.4 | 1.000 | 1.1  | 0.984 |
| <i>Gstm3</i>   | 3.1   | 0.044  | 0.6   | 0.456  | 2.5 | 0.564 | 0.5  | 0.625 |

|               |       |        |        |        |     |       |     |       |
|---------------|-------|--------|--------|--------|-----|-------|-----|-------|
| <i>Gstm4</i>  | 1.1   | 0.800  | 0.8    | 0.503  | 0.8 | 1.000 | 0.5 | 0.289 |
| <i>Gstm5</i>  | 1.1   | 0.948  | 1.2    | 0.635  | 0.7 | 1.000 | 0.8 | 0.884 |
| <i>Gstm6</i>  | 0.9   | 0.908  | 0.9    | 0.892  | 1.3 | 1.000 | 1.3 | 0.922 |
| <i>Gstm7</i>  | 0.8   | 0.809  | 0.8    | 0.797  | 1.0 | 1.000 | 1.1 | 1.000 |
| <i>Gsto1</i>  | 0.8   | 0.496  | 1.1    | 0.882  | 0.9 | 1.000 | 1.3 | 0.822 |
| <i>Gsto2</i>  | 1.0   | 1.000  | 1.1    | 0.938  | 0.5 | 1.000 | 0.6 | 0.817 |
| <i>Gstp1</i>  | 3.4   | 0.002  | 2.2    | 0.039  | 0.9 | 1.000 | 0.6 | 0.635 |
| <i>Gstp2</i>  | 5.9   | 0.016  | 1.8    | 0.505  | 0.9 | 1.000 | 0.3 | 0.386 |
| <i>Gstp3</i>  | 1.9   | 0.190  | 1.4    | 0.516  | 1.1 | 1.000 | 0.8 | 0.951 |
| <i>Gstt1</i>  | 0.4   | 0.005  | 0.4    | 0.017  | 0.8 | 1.000 | 0.9 | 0.976 |
| <i>Gstt2</i>  | 0.6   | 0.182  | 0.7    | 0.380  | 0.9 | 1.000 | 1.0 | 1.000 |
| <i>Gstt3</i>  | 1.5   | 0.177  | 2.0    | 0.005  | 0.8 | 1.000 | 1.1 | 0.951 |
| <i>Abca1</i>  | 1.3   | 0.494  | 1.4    | 0.365  | 1.0 | 1.000 | 1.0 | 1.000 |
| <i>Abca13</i> | 10.9  | 0.144  | 0.2    | 0.365  | 5.3 | 1.000 | 0.1 | 0.451 |
| <i>Abca17</i> | 103.3 | <0.001 | 1779.0 | <0.001 | 0.1 | 0.757 | 1.2 | 0.989 |
| <i>Abca2</i>  | 1.2   | 0.873  | 1.4    | 0.579  | 0.8 | 1.000 | 1.0 | 1.000 |
| <i>Abca3</i>  | 1.1   | 0.896  | 1.8    | 0.112  | 0.6 | 0.873 | 1.0 | 1.000 |
| <i>Abca4</i>  | 2.0   | 0.383  | 0.7    | 0.702  | 1.1 | 1.000 | 0.4 | 0.526 |
| <i>Abca5</i>  | 2.0   | 0.025  | 3.3    | <0.001 | 0.8 | 1.000 | 1.3 | 0.768 |
| <i>Abca6</i>  | 1.1   | 0.951  | 1.4    | 0.512  | 1.0 | 1.000 | 1.3 | 0.859 |
| <i>Abca7</i>  | 0.9   | 0.851  | 0.5    | 0.006  | 1.1 | 1.000 | 0.6 | 0.298 |
| <i>Abca8a</i> | 0.7   | 0.493  | 0.5    | 0.158  | 1.4 | 1.000 | 1.0 | 1.000 |
| <i>Abca8b</i> | 1.2   | 0.650  | 1.4    | 0.308  | 0.9 | 1.000 | 1.1 | 0.999 |
| <i>Abca9</i>  | 1.5   | 0.328  | 1.3    | 0.495  | 1.1 | 1.000 | 1.0 | 1.000 |
| <i>Abcb10</i> | 0.9   | 0.586  | 1.0    | 0.964  | 0.8 | 0.817 | 0.9 | 0.856 |
| <i>Abcb11</i> | 0.7   | 0.438  | 0.9    | 0.794  | 0.9 | 1.000 | 1.2 | 0.950 |
| <i>Abcb1a</i> | 0.6   | 0.333  | 0.7    | 0.438  | 0.9 | 1.000 | 1.0 | 1.000 |
| <i>Abcb1b</i> | 1.7   | 0.553  | 1.8    | 0.465  | 1.2 | 1.000 | 1.2 | 0.986 |
| <i>Abcb4</i>  | 0.6   | 0.214  | 0.7    | 0.424  | 0.9 | 1.000 | 1.0 | 1.000 |
| <i>Abcb6</i>  | 0.6   | 0.019  | 0.7    | 0.129  | 1.0 | 1.000 | 1.2 | 0.830 |
| <i>Abcb7</i>  | 1.0   | 0.939  | 1.3    | 0.387  | 0.8 | 1.000 | 1.0 | 1.000 |
| <i>Abcb8</i>  | 0.6   | 0.057  | 0.6    | 0.091  | 0.9 | 1.000 | 1.0 | 1.000 |
| <i>Abcb9</i>  | 1.2   | 0.650  | 1.0    | 0.973  | 1.2 | 1.000 | 1.0 | 1.000 |
| <i>Abcc1</i>  | 1.6   | 0.344  | 0.9    | 0.890  | 1.6 | 0.978 | 0.9 | 0.998 |
| <i>Abcc10</i> | 0.8   | 0.667  | 0.7    | 0.303  | 1.1 | 1.000 | 0.9 | 0.985 |
| <i>Abcc12</i> | 0.8   | 0.840  | 0.5    | 0.456  | 0.9 | 1.000 | 0.6 | 0.876 |
| <i>Abcc2</i>  | 0.8   | 0.803  | 0.8    | 0.768  | 1.0 | 1.000 | 1.0 | 1.000 |
| <i>Abcc3</i>  | 0.3   | 0.025  | 0.1    | <0.001 | 1.0 | 1.000 | 0.5 | 0.613 |
| <i>Abcc4</i>  | 1.4   | 0.698  | 1.0    | 0.977  | 1.5 | 1.000 | 1.2 | 0.978 |
| <i>Abcc5</i>  | 1.4   | 0.635  | 0.9    | 0.863  | 1.1 | 1.000 | 0.7 | 0.816 |
| <i>Abcc6</i>  | 0.6   | 0.364  | 0.7    | 0.395  | 1.1 | 1.000 | 1.2 | 0.955 |
| <i>Abcc8</i>  | 0.7   | 0.928  | 1.4    | 0.901  | 1.3 | 1.000 | 2.5 | 0.914 |
| <i>Abcc9</i>  | 1.0   | 0.979  | 1.2    | 0.667  | 0.9 | 1.000 | 1.2 | 0.941 |
| <i>Abcd1</i>  | 1.0   | 0.959  | 1.2    | 0.426  | 0.8 | 1.000 | 1.0 | 1.000 |
| <i>Abcd2</i>  | 1.1   | 0.947  | 1.4    | 0.650  | 0.7 | 1.000 | 0.9 | 1.000 |
| <i>Abcd3</i>  | 0.8   | 0.328  | 0.8    | 0.538  | 0.8 | 0.877 | 0.8 | 0.801 |
| <i>Abcd4</i>  | 0.8   | 0.406  | 0.6    | 0.078  | 1.2 | 1.000 | 1.0 | 1.000 |
| <i>Abce1</i>  | 1.1   | 0.715  | 1.2    | 0.477  | 1.0 | 1.000 | 1.0 | 1.000 |

|                 |      |        |      |        |     |       |     |       |
|-----------------|------|--------|------|--------|-----|-------|-----|-------|
| <i>Abcf1</i>    | 0.9  | 0.652  | 1.0  | 0.983  | 0.9 | 1.000 | 1.0 | 1.000 |
| <i>Abcf2</i>    | 0.9  | 0.817  | 1.0  | 0.893  | 0.9 | 1.000 | 1.0 | 0.997 |
| <i>Abcf3</i>    | 0.7  | 0.151  | 0.8  | 0.377  | 0.8 | 1.000 | 0.9 | 0.988 |
| <i>Abcg1</i>    | 1.3  | 0.734  | 0.9  | 0.880  | 0.9 | 1.000 | 0.7 | 0.773 |
| <i>Abcg2</i>    | 1.1  | 0.762  | 1.1  | 0.800  | 0.9 | 1.000 | 0.9 | 0.969 |
| <i>Abcg3</i>    | 1.5  | 0.459  | 1.0  | 0.975  | 0.9 | 1.000 | 0.6 | 0.678 |
| <i>Abcg4</i>    | 3.2  | 0.693  | 0.4  | 0.581  | 9.4 | 0.917 | 1.1 | 1.000 |
| <i>Abcg5</i>    | 0.4  | 0.003  | 0.4  | 0.009  | 1.3 | 1.000 | 1.4 | 0.696 |
| <i>Abcg8</i>    | 0.5  | 0.008  | 0.6  | 0.061  | 1.2 | 1.000 | 1.4 | 0.613 |
| <i>Slc10a1</i>  | 0.4  | 0.020  | 0.5  | 0.045  | 0.8 | 1.000 | 1.0 | 1.000 |
| <i>Slc10a2</i>  | 0.9  | 0.947  | 1.2  | 0.693  | 1.0 | 1.000 | 1.3 | 0.878 |
| <i>Slc10a3</i>  | 0.9  | 0.681  | 1.0  | 1.000  | 0.8 | 1.000 | 1.0 | 1.000 |
| <i>Slc10a5</i>  | 1.2  | 0.821  | 1.1  | 0.915  | 0.9 | 1.000 | 0.8 | 0.972 |
| <i>Slc10a6</i>  | 0.2  | 0.249  | 0.6  | 0.650  | 1.0 | 1.000 | 2.4 | 0.830 |
| <i>Slc10a7</i>  | 1.0  | 0.978  | 0.8  | 0.495  | 1.3 | 1.000 | 1.0 | 1.000 |
| <i>Slc11a1</i>  | 1.5  | 0.567  | 1.2  | 0.836  | 0.7 | 1.000 | 0.6 | 0.689 |
| <i>Slc11a2</i>  | 1.4  | 0.314  | 0.9  | 0.855  | 1.0 | 1.000 | 0.7 | 0.514 |
| <i>Slc12a2</i>  | 0.9  | 0.888  | 1.1  | 0.725  | 1.3 | 0.962 | 1.5 | 0.314 |
| <i>Slc12a3</i>  | 0.8  | 0.900  | 0.7  | 0.697  | 1.7 | 1.000 | 1.4 | 0.945 |
| <i>Slc12a4</i>  | 0.9  | 0.914  | 0.8  | 0.408  | 1.0 | 1.000 | 0.8 | 0.820 |
| <i>Slc12a5</i>  | 0.7  | 0.792  | 0.5  | 0.446  | 0.9 | 1.000 | 0.7 | 0.916 |
| <i>Slc12a6</i>  | 1.1  | 0.789  | 0.9  | 0.662  | 1.1 | 1.000 | 0.9 | 0.901 |
| <i>Slc12a7</i>  | 0.6  | 0.153  | 0.6  | 0.066  | 0.8 | 1.000 | 0.8 | 0.768 |
| <i>Slc12a8</i>  | 1.2  | 0.909  | 1.0  | 1.000  | 1.3 | 1.000 | 1.1 | 1.000 |
| <i>Slc12a9</i>  | 0.7  | 0.472  | 0.9  | 0.883  | 1.1 | 1.000 | 1.4 | 0.768 |
| <i>Slc13a2</i>  | 1.4  | 0.779  | 2.6  | 0.158  | 0.5 | 1.000 | 1.0 | 1.000 |
| <i>Slc13a3</i>  | 0.4  | 0.068  | 0.5  | 0.244  | 0.7 | 1.000 | 0.9 | 0.997 |
| <i>Slc13a4</i>  | 0.3  | 0.250  | 0.6  | 0.672  | 0.6 | 1.000 | 1.2 | 1.000 |
| <i>Slc13a5</i>  | 0.4  | 0.216  | 0.2  | 0.070  | 0.8 | 1.000 | 0.5 | 0.788 |
| <i>Slc14a1</i>  | 1.4  | 0.878  | 6.5  | 0.066  | 0.5 | 1.000 | 2.5 | 0.768 |
| <i>Slc14a2</i>  | 1.4  | 0.947  | 3.9  | 0.479  | 0.2 | 1.000 | 0.5 | 0.941 |
| <i>Slc15a1</i>  | 1.2  | 0.915  | 0.9  | 0.938  | 1.2 | 1.000 | 0.8 | 0.995 |
| <i>Slc15a2</i>  | 1.5  | 0.736  | 0.3  | 0.229  | 2.3 | 1.000 | 0.5 | 0.809 |
| <i>Slc15a3</i>  | 1.8  | 0.316  | 1.0  | 0.994  | 0.9 | 1.000 | 0.5 | 0.550 |
| <i>Slc15a4</i>  | 0.9  | 0.761  | 0.6  | 0.072  | 1.2 | 1.000 | 0.8 | 0.874 |
| <i>Slc15a5</i>  | 0.5  | 0.404  | 0.7  | 0.786  | 0.5 | 1.000 | 0.8 | 0.986 |
| <i>Slc16a1</i>  | 2.0  | 0.018  | 1.6  | 0.142  | 0.9 | 1.000 | 0.7 | 0.625 |
| <i>Slc16a10</i> | 0.5  | 0.051  | 0.7  | 0.283  | 1.1 | 1.000 | 1.5 | 0.635 |
| <i>Slc16a11</i> | 0.9  | 0.897  | 1.0  | 0.995  | 0.6 | 0.953 | 0.7 | 0.768 |
| <i>Slc16a12</i> | 0.5  | 0.088  | 0.7  | 0.401  | 0.9 | 1.000 | 1.2 | 0.945 |
| <i>Slc16a13</i> | 2.2  | 0.136  | 1.6  | 0.408  | 0.5 | 0.940 | 0.4 | 0.347 |
| <i>Slc16a2</i>  | 0.7  | 0.628  | 1.0  | 0.974  | 0.8 | 1.000 | 1.1 | 0.999 |
| <i>Slc16a3</i>  | 3.3  | 0.107  | 1.1  | 0.959  | 2.2 | 1.000 | 0.7 | 0.945 |
| <i>Slc16a4</i>  | 0.9  | 0.900  | 0.6  | 0.341  | 1.2 | 1.000 | 0.8 | 0.946 |
| <i>Slc16a5</i>  | 1.0  | 0.978  | 1.2  | 0.781  | 1.1 | 1.000 | 1.2 | 0.917 |
| <i>Slc16a6</i>  | 16.2 | <0.001 | 14.4 | <0.001 | 1.1 | 1.000 | 1.0 | 1.000 |
| <i>Slc16a7</i>  | 0.7  | 0.458  | 0.8  | 0.633  | 1.1 | 1.000 | 1.2 | 0.854 |
| <i>Slc16a9</i>  | 1.1  | 0.908  | 1.2  | 0.752  | 0.9 | 1.000 | 1.0 | 1.000 |

|                     |       |        |       |        |     |       |     |       |
|---------------------|-------|--------|-------|--------|-----|-------|-----|-------|
| <i>Slc17a1</i>      | 0.7   | 0.687  | 0.6   | 0.507  | 1.0 | 1.000 | 0.9 | 0.993 |
| <i>Slc17a2</i>      | 0.3   | 0.057  | 0.2   | 0.009  | 0.9 | 1.000 | 0.6 | 0.816 |
| <i>Slc17a3</i>      | 0.7   | 0.336  | 0.9   | 0.685  | 0.9 | 1.000 | 1.1 | 0.987 |
| <i>Slc17a4</i>      | 1.7   | 0.415  | 1.5   | 0.493  | 1.3 | 1.000 | 1.1 | 0.996 |
| <i>Slc17a5</i>      | 0.9   | 0.930  | 1.1   | 0.872  | 1.0 | 1.000 | 1.2 | 0.930 |
| <i>Slc17a8</i>      | 1.9   | 0.375  | 0.6   | 0.519  | 1.0 | 1.000 | 0.4 | 0.383 |
| <i>Slc17a9</i>      | 1.4   | 0.593  | 1.2   | 0.757  | 0.9 | 1.000 | 0.8 | 0.950 |
| <i>Slc18a1</i>      | 1.4   | 0.575  | 1.1   | 0.845  | 1.3 | 1.000 | 1.1 | 1.000 |
| <i>Slc18a2</i>      | 1.0   | 0.977  | 1.0   | 0.984  | 1.0 | 1.000 | 0.9 | 1.000 |
| <i>Slc18b1</i>      | 0.9   | 0.915  | 1.1   | 0.939  | 0.8 | 1.000 | 1.0 | 1.000 |
| <i>Slc19a1</i>      | 0.6   | 0.178  | 0.8   | 0.557  | 1.1 | 1.000 | 1.4 | 0.761 |
| <i>Slc19a2</i>      | 0.7   | 0.156  | 0.7   | 0.198  | 0.9 | 1.000 | 0.9 | 0.996 |
| <i>Slc19a3</i>      | 0.4   | 0.650  | 3.7   | 0.483  | 0.4 | 1.000 | 3.7 | 0.816 |
| <i>Slc1a1</i>       | 1.2   | 0.900  | 1.4   | 0.800  | 0.9 | 1.000 | 1.1 | 1.000 |
| <i>Slc1a2</i>       | 1.5   | 0.699  | 2.1   | 0.313  | 1.4 | 1.000 | 2.0 | 0.756 |
| <i>Slc1a3</i>       | 1.5   | 0.825  | 0.6   | 0.660  | 1.4 | 1.000 | 0.5 | 0.895 |
| <i>Slc1a4</i>       | 1.8   | 0.140  | 1.0   | 1.000  | 1.1 | 1.000 | 0.6 | 0.533 |
| <i>Slc1a5</i>       | 0.7   | 0.616  | 0.5   | 0.141  | 1.3 | 1.000 | 0.9 | 0.987 |
| <i>Slc1a6</i>       | 0.5   | 0.714  | 0.3   | 0.475  | 0.9 | 1.000 | 0.5 | 0.951 |
| <i>Slc20a1</i>      | 0.6   | 0.059  | 0.7   | 0.141  | 1.1 | 1.000 | 1.2 | 0.832 |
| <i>Slc20a2</i>      | 1.4   | 0.188  | 1.5   | 0.113  | 1.0 | 1.000 | 1.0 | 1.000 |
| <i>Slc22a1</i>      | 0.8   | 0.595  | 0.9   | 0.847  | 1.0 | 1.000 | 1.2 | 0.953 |
| <i>Slc22a13b-ps</i> | 0.4   | 0.487  | 0.5   | 0.528  | 0.9 | 1.000 | 1.0 | 1.000 |
| <i>Slc22a15</i>     | 0.5   | 0.008  | 0.5   | 0.028  | 1.1 | 1.000 | 1.2 | 0.869 |
| <i>Slc22a17</i>     | 1.0   | 0.990  | 0.9   | 0.906  | 0.9 | 1.000 | 0.8 | 0.975 |
| <i>Slc22a18</i>     | 0.7   | 0.294  | 0.9   | 0.810  | 1.0 | 1.000 | 1.4 | 0.768 |
| <i>Slc22a2</i>      | 260.5 | <0.001 | 561.5 | <0.001 | 0.4 | 1.000 | 0.8 | 0.984 |
| <i>Slc22a21</i>     | 0.3   | 0.083  | 1.9   | 0.337  | 0.5 | 0.889 | 2.8 | 0.433 |
| <i>Slc22a23</i>     | 1.4   | 0.270  | 1.6   | 0.080  | 1.0 | 1.000 | 1.1 | 0.967 |
| <i>Slc22a26</i>     | 0.6   | 0.352  | 1.0   | 1.000  | 0.7 | 1.000 | 1.1 | 0.985 |
| <i>Slc22a27</i>     | 0.5   | 0.126  | 0.5   | 0.101  | 0.6 | 0.992 | 0.6 | 0.665 |
| <i>Slc22a28</i>     | 2.9   | 0.100  | 2.8   | 0.102  | 1.3 | 1.000 | 1.2 | 0.976 |
| <i>Slc22a29</i>     | 0.2   | 0.075  | 0.2   | 0.072  | 0.9 | 1.000 | 0.9 | 1.000 |
| <i>Slc22a3</i>      | 0.9   | 0.930  | 0.9   | 0.890  | 1.6 | 1.000 | 1.6 | 0.767 |
| <i>Slc22a30</i>     | 1.1   | 0.852  | 1.3   | 0.317  | 0.9 | 1.000 | 1.1 | 0.996 |
| <i>Slc22a4</i>      | 0.5   | 0.194  | 0.8   | 0.825  | 0.8 | 1.000 | 1.3 | 0.917 |
| <i>Slc22a5</i>      | 0.8   | 0.566  | 0.9   | 0.709  | 1.0 | 1.000 | 1.1 | 0.951 |
| <i>Slc22a6</i>      | 0.4   | 0.654  | 0.2   | 0.449  | 1.7 | 1.000 | 1.0 | 1.000 |
| <i>Slc22a7</i>      | 1.3   | 0.713  | 3.1   | 0.004  | 0.5 | 0.437 | 1.1 | 0.975 |
| <i>Slc22a8</i>      | 0.3   | 0.567  | 0.0   | 0.108  | 1.9 | 1.000 | 0.3 | 0.890 |
| <i>Slc23a1</i>      | 1.0   | 1.000  | 1.2   | 0.682  | 0.7 | 1.000 | 0.9 | 0.969 |
| <i>Slc23a2</i>      | 0.6   | 0.194  | 0.7   | 0.336  | 0.9 | 1.000 | 1.0 | 1.000 |
| <i>Slc23a3</i>      | 1.1   | 0.975  | 0.6   | 0.764  | 2.7 | 1.000 | 1.5 | 0.974 |
| <i>Slc23a4</i>      | 1.6   | 0.654  | 0.4   | 0.269  | 1.7 | 1.000 | 0.4 | 0.681 |
| <i>Slc24a3</i>      | 9.5   | <0.001 | 6.6   | <0.001 | 1.3 | 1.000 | 0.9 | 0.969 |
| <i>Slc24a5</i>      | 0.7   | 0.690  | 0.9   | 0.920  | 0.6 | 1.000 | 0.8 | 0.962 |
| <i>Slc25a1</i>      | 0.7   | 0.153  | 0.8   | 0.343  | 0.7 | 0.811 | 0.8 | 0.786 |
| <i>Slc25a10</i>     | 0.7   | 0.080  | 0.8   | 0.336  | 0.9 | 1.000 | 1.0 | 1.000 |



|                 |     |       |     |        |     |       |     |       |
|-----------------|-----|-------|-----|--------|-----|-------|-----|-------|
| <i>Slc25a11</i> | 0.7 | 0.016 | 0.7 | 0.029  | 1.0 | 1.000 | 1.0 | 1.000 |
| <i>Slc25a12</i> | 1.0 | 0.989 | 0.9 | 0.845  | 0.9 | 1.000 | 0.8 | 0.901 |
| <i>Slc25a13</i> | 0.7 | 0.220 | 0.8 | 0.529  | 1.0 | 1.000 | 1.2 | 0.880 |
| <i>Slc25a14</i> | 1.1 | 0.944 | 0.7 | 0.420  | 1.1 | 1.000 | 0.7 | 0.768 |
| <i>Slc25a15</i> | 0.8 | 0.688 | 0.9 | 0.833  | 1.3 | 1.000 | 1.4 | 0.713 |
| <i>Slc25a16</i> | 1.0 | 0.995 | 1.1 | 0.796  | 1.1 | 1.000 | 1.2 | 0.857 |
| <i>Slc25a17</i> | 1.0 | 0.943 | 0.9 | 0.500  | 0.9 | 1.000 | 0.8 | 0.654 |
| <i>Slc25a18</i> | 1.4 | 0.820 | 0.4 | 0.257  | 2.5 | 0.940 | 0.7 | 0.945 |
| <i>Slc25a19</i> | 0.8 | 0.291 | 0.6 | 0.015  | 1.1 | 1.000 | 0.9 | 0.857 |
| <i>Slc25a20</i> | 1.0 | 0.975 | 1.0 | 0.908  | 1.0 | 1.000 | 0.9 | 0.946 |
| <i>Slc25a21</i> | 0.7 | 0.286 | 0.6 | 0.182  | 1.0 | 1.000 | 0.9 | 0.978 |
| <i>Slc25a22</i> | 1.0 | 0.990 | 0.7 | 0.221  | 1.4 | 0.757 | 1.0 | 0.999 |
| <i>Slc25a23</i> | 0.7 | 0.245 | 1.0 | 1.000  | 0.8 | 1.000 | 1.2 | 0.924 |
| <i>Slc25a24</i> | 1.1 | 0.862 | 1.2 | 0.703  | 1.1 | 1.000 | 1.2 | 0.945 |
| <i>Slc25a25</i> | 1.1 | 0.885 | 1.1 | 0.861  | 1.6 | 1.000 | 1.6 | 0.701 |
| <i>Slc25a26</i> | 1.1 | 0.849 | 1.1 | 0.732  | 0.9 | 1.000 | 1.0 | 1.000 |
| <i>Slc25a27</i> | 0.8 | 0.836 | 0.4 | 0.229  | 1.8 | 1.000 | 1.0 | 1.000 |
| <i>Slc25a28</i> | 0.6 | 0.007 | 0.7 | 0.024  | 0.9 | 1.000 | 0.9 | 0.953 |
| <i>Slc25a29</i> | 0.8 | 0.585 | 1.0 | 0.977  | 1.0 | 1.000 | 1.3 | 0.816 |
| <i>Slc25a3</i>  | 0.8 | 0.504 | 0.8 | 0.231  | 1.0 | 1.000 | 0.9 | 0.947 |
| <i>Slc25a30</i> | 1.7 | 0.128 | 2.2 | 0.010  | 0.5 | 0.315 | 0.7 | 0.639 |
| <i>Slc25a31</i> | 0.4 | 0.521 | 0.4 | 0.589  | 1.0 | 1.000 | 1.2 | 1.000 |
| <i>Slc25a32</i> | 0.8 | 0.457 | 0.8 | 0.381  | 1.3 | 1.000 | 1.3 | 0.722 |
| <i>Slc25a33</i> | 1.4 | 0.250 | 1.5 | 0.147  | 0.9 | 1.000 | 0.9 | 0.999 |
| <i>Slc25a34</i> | 1.0 | 1.000 | 1.1 | 0.936  | 1.0 | 1.000 | 1.1 | 0.998 |
| <i>Slc25a35</i> | 0.7 | 0.608 | 0.9 | 0.890  | 0.9 | 1.000 | 1.2 | 0.985 |
| <i>Slc25a36</i> | 1.2 | 0.683 | 1.5 | 0.299  | 1.1 | 1.000 | 1.3 | 0.837 |
| <i>Slc25a37</i> | 0.5 | 0.012 | 0.6 | 0.027  | 0.9 | 1.000 | 1.0 | 1.000 |
| <i>Slc25a38</i> | 0.9 | 0.631 | 0.9 | 0.609  | 1.1 | 1.000 | 1.1 | 0.869 |
| <i>Slc25a39</i> | 0.7 | 0.070 | 0.8 | 0.298  | 0.9 | 1.000 | 1.0 | 0.994 |
| <i>Slc25a4</i>  | 1.0 | 0.948 | 0.8 | 0.628  | 1.0 | 1.000 | 0.8 | 0.799 |
| <i>Slc25a40</i> | 1.1 | 0.943 | 0.9 | 0.833  | 0.9 | 1.000 | 0.8 | 0.854 |
| <i>Slc25a42</i> | 0.8 | 0.396 | 0.7 | 0.320  | 0.9 | 1.000 | 0.9 | 0.912 |
| <i>Slc25a43</i> | 0.8 | 0.876 | 0.5 | 0.329  | 0.8 | 1.000 | 0.4 | 0.625 |
| <i>Slc25a44</i> | 1.1 | 0.895 | 1.1 | 0.701  | 1.0 | 1.000 | 1.0 | 1.000 |
| <i>Slc25a45</i> | 0.9 | 0.916 | 1.0 | 0.983  | 0.8 | 1.000 | 0.9 | 0.913 |
| <i>Slc25a46</i> | 0.9 | 0.787 | 1.1 | 0.728  | 1.0 | 1.000 | 1.2 | 0.800 |
| <i>Slc25a47</i> | 0.9 | 0.746 | 0.9 | 0.861  | 1.2 | 1.000 | 1.3 | 0.817 |
| <i>Slc25a48</i> | 0.6 | 0.189 | 0.7 | 0.387  | 1.2 | 1.000 | 1.4 | 0.753 |
| <i>Slc25a5</i>  | 0.8 | 0.388 | 0.8 | 0.271  | 0.9 | 1.000 | 0.9 | 0.886 |
| <i>Slc25a51</i> | 0.6 | 0.026 | 0.3 | <0.001 | 1.8 | 0.181 | 1.1 | 0.951 |
| <i>Slc25a53</i> | 1.2 | 0.893 | 0.7 | 0.703  | 1.4 | 1.000 | 0.8 | 0.979 |
| <i>Slc26a1</i>  | 0.8 | 0.793 | 1.1 | 0.903  | 0.9 | 1.000 | 1.1 | 0.988 |
| <i>Slc26a10</i> | 0.4 | 0.079 | 0.3 | 0.006  | 1.3 | 1.000 | 0.9 | 0.988 |
| <i>Slc26a11</i> | 0.9 | 0.864 | 0.7 | 0.206  | 1.1 | 1.000 | 0.8 | 0.833 |
| <i>Slc26a2</i>  | 1.2 | 0.580 | 1.0 | 0.994  | 1.1 | 1.000 | 0.9 | 0.961 |
| <i>Slc26a3</i>  | 1.4 | 0.899 | 7.5 | 0.104  | 0.9 | 1.000 | 4.8 | 0.601 |
| <i>Slc26a4</i>  | 0.1 | 0.009 | 0.2 | 0.016  | 1.2 | 1.000 | 1.6 | 0.947 |

|                    |     |       |     |       |     |       |     |       |
|--------------------|-----|-------|-----|-------|-----|-------|-----|-------|
| <i>Slc26a6</i>     | 1.1 | 0.955 | 1.9 | 0.062 | 0.5 | 0.536 | 1.0 | 1.000 |
| <i>Slc26a7</i>     | 0.1 | 0.150 | 3.3 | 0.516 | 0.1 | 0.615 | 3.3 | 0.838 |
| <i>Slc26a8</i>     | 0.4 | 0.450 | 0.7 | 0.800 | 0.9 | 1.000 | 1.6 | 0.950 |
| <i>Slc27a1</i>     | 0.7 | 0.210 | 0.6 | 0.018 | 1.3 | 1.000 | 1.0 | 1.000 |
| <i>Slc27a2</i>     | 0.7 | 0.547 | 0.7 | 0.530 | 1.0 | 1.000 | 1.0 | 1.000 |
| <i>Slc27a3</i>     | 1.9 | 0.334 | 0.8 | 0.754 | 2.7 | 0.438 | 1.1 | 0.998 |
| <i>Slc27a4</i>     | 1.0 | 0.934 | 1.2 | 0.517 | 0.9 | 1.000 | 1.1 | 0.945 |
| <i>Slc27a5</i>     | 0.6 | 0.242 | 0.9 | 0.837 | 0.8 | 1.000 | 1.2 | 0.943 |
| <i>Slc27a6</i>     | 1.8 | 0.632 | 0.8 | 0.920 | 1.5 | 1.000 | 0.7 | 0.951 |
| <i>Slc28a1</i>     | 0.4 | 0.347 | 0.6 | 0.572 | 0.8 | 1.000 | 1.2 | 1.000 |
| <i>Slc28a2</i>     | 1.3 | 0.804 | 1.3 | 0.788 | 1.0 | 1.000 | 1.0 | 1.000 |
| <i>Slc28a3</i>     | 0.4 | 0.702 | 0.7 | 0.837 | 4.2 | 0.875 | 7.3 | 0.597 |
| <i>Slc29a1</i>     | 0.7 | 0.137 | 0.7 | 0.166 | 1.1 | 1.000 | 1.2 | 0.888 |
| <i>Slc29a2</i>     | 0.6 | 0.285 | 0.4 | 0.075 | 1.0 | 1.000 | 0.7 | 0.888 |
| <i>Slc29a3</i>     | 1.2 | 0.806 | 1.5 | 0.321 | 0.8 | 1.000 | 1.1 | 0.993 |
| <i>Slc29a4</i>     | 0.9 | 0.996 | 0.2 | 0.287 | 2.8 | 1.000 | 0.7 | 0.983 |
| <i>Slc2a1</i>      | 1.0 | 0.990 | 0.9 | 0.940 | 0.9 | 1.000 | 0.8 | 0.946 |
| <i>Slc2a10</i>     | 0.9 | 0.977 | 1.4 | 0.800 | 0.8 | 1.000 | 1.2 | 0.999 |
| <i>Slc2a12</i>     | 0.7 | 0.737 | 3.2 | 0.106 | 0.4 | 0.761 | 1.6 | 0.847 |
| <i>Slc2a13</i>     | 1.3 | 0.817 | 0.6 | 0.495 | 1.9 | 0.995 | 1.0 | 1.000 |
| <i>Slc2a2</i>      | 0.5 | 0.233 | 0.6 | 0.438 | 1.1 | 1.000 | 1.4 | 0.911 |
| <i>Slc2a3</i>      | 1.9 | 0.495 | 3.4 | 0.116 | 2.8 | 0.873 | 5.0 | 0.242 |
| <i>Slc2a4</i>      | 0.3 | 0.257 | 0.4 | 0.296 | 2.0 | 1.000 | 2.3 | 0.739 |
| <i>Slc2a4rg-ps</i> | 0.6 | 0.453 | 0.4 | 0.071 | 1.2 | 1.000 | 0.8 | 0.914 |
| <i>Slc2a5</i>      | 0.9 | 0.948 | 1.2 | 0.796 | 0.9 | 1.000 | 1.1 | 0.991 |
| <i>Slc2a6</i>      | 4.4 | 0.144 | 0.6 | 0.668 | 1.7 | 1.000 | 0.2 | 0.478 |
| <i>Slc2a7</i>      | 1.0 | 1.000 | 1.0 | 1.000 | 1.0 | 1.000 | 1.0 | 1.000 |
| <i>Slc2a8</i>      | 1.0 | 0.919 | 1.0 | 0.970 | 0.9 | 1.000 | 1.0 | 0.998 |
| <i>Slc2a9</i>      | 0.7 | 0.404 | 0.8 | 0.550 | 0.9 | 1.000 | 1.0 | 1.000 |
| <i>Slc30a1</i>     | 1.3 | 0.505 | 1.6 | 0.051 | 1.0 | 1.000 | 1.3 | 0.799 |
| <i>Slc30a10</i>    | 1.7 | 0.622 | 1.3 | 0.854 | 1.1 | 1.000 | 0.8 | 0.984 |
| <i>Slc30a2</i>     | 2.0 | 0.661 | 2.1 | 0.775 | 0.3 | 1.000 | 0.3 | 0.747 |
| <i>Slc30a3</i>     | 0.4 | 0.499 | 0.4 | 0.533 | 0.5 | 1.000 | 0.6 | 0.946 |
| <i>Slc30a4</i>     | 1.4 | 0.351 | 1.4 | 0.333 | 1.1 | 1.000 | 1.1 | 0.985 |
| <i>Slc30a5</i>     | 1.1 | 0.870 | 1.0 | 0.975 | 1.0 | 1.000 | 1.0 | 1.000 |
| <i>Slc30a6</i>     | 1.2 | 0.552 | 1.2 | 0.454 | 1.0 | 1.000 | 1.0 | 1.000 |
| <i>Slc30a7</i>     | 1.0 | 0.973 | 0.9 | 0.921 | 0.8 | 1.000 | 0.8 | 0.901 |
| <i>Slc30a9</i>     | 0.8 | 0.245 | 0.8 | 0.181 | 1.0 | 1.000 | 1.0 | 1.000 |
| <i>Slc31a1</i>     | 0.9 | 0.851 | 1.1 | 0.739 | 0.9 | 1.000 | 1.1 | 0.960 |
| <i>Slc31a2</i>     | 1.1 | 0.797 | 1.1 | 0.751 | 0.9 | 1.000 | 0.9 | 0.971 |
| <i>Slc33a1</i>     | 1.4 | 0.280 | 1.5 | 0.076 | 1.0 | 1.000 | 1.1 | 0.943 |
| <i>Slc34a2</i>     | 2.6 | 0.176 | 2.0 | 0.403 | 0.6 | 1.000 | 0.5 | 0.694 |
| <i>Slc34a3</i>     | 1.0 | 1.000 | 1.0 | 1.000 | 1.0 | 1.000 | 1.0 | 1.000 |
| <i>Slc35a1</i>     | 0.9 | 0.827 | 1.1 | 0.578 | 0.8 | 0.999 | 1.0 | 1.000 |
| <i>Slc35a2</i>     | 1.0 | 0.930 | 1.0 | 0.947 | 1.0 | 1.000 | 1.1 | 0.988 |
| <i>Slc35a3</i>     | 1.0 | 0.937 | 1.1 | 0.709 | 1.0 | 1.000 | 1.1 | 0.978 |
| <i>Slc35a4</i>     | 0.9 | 0.938 | 1.3 | 0.506 | 1.0 | 1.000 | 1.5 | 0.689 |
| <i>Slc35a5</i>     | 1.1 | 0.800 | 1.0 | 1.000 | 1.1 | 1.000 | 1.0 | 1.000 |

|                 |      |        |     |        |     |       |     |       |
|-----------------|------|--------|-----|--------|-----|-------|-----|-------|
| <i>Slc35b1</i>  | 1.8  | 0.006  | 2.5 | <0.001 | 1.0 | 1.000 | 1.3 | 0.617 |
| <i>Slc35b2</i>  | 1.0  | 0.977  | 1.5 | 0.089  | 0.9 | 1.000 | 1.3 | 0.629 |
| <i>Slc35b3</i>  | 1.1  | 0.771  | 1.3 | 0.272  | 0.8 | 1.000 | 1.0 | 0.996 |
| <i>Slc35b4</i>  | 1.0  | 0.984  | 1.4 | 0.288  | 0.9 | 1.000 | 1.4 | 0.753 |
| <i>Slc35c1</i>  | 1.3  | 0.254  | 1.6 | 0.029  | 0.9 | 1.000 | 1.1 | 0.953 |
| <i>Slc35c2</i>  | 1.7  | 0.003  | 2.0 | <0.001 | 0.9 | 1.000 | 1.0 | 1.000 |
| <i>Slc35d1</i>  | 1.2  | 0.546  | 1.1 | 0.735  | 0.8 | 1.000 | 0.8 | 0.595 |
| <i>Slc35d2</i>  | 1.2  | 0.542  | 1.5 | 0.131  | 0.8 | 1.000 | 1.0 | 1.000 |
| <i>Slc35d3</i>  | 3.5  | 0.641  | 5.8 | 0.488  | 0.4 | 1.000 | 0.6 | 0.984 |
| <i>Slc35e1</i>  | 1.1  | 0.628  | 1.0 | 0.919  | 1.1 | 1.000 | 1.0 | 0.997 |
| <i>Slc35e2</i>  | 1.0  | 0.944  | 1.0 | 0.964  | 1.3 | 0.817 | 1.3 | 0.702 |
| <i>Slc35e3</i>  | 0.8  | 0.483  | 0.7 | 0.158  | 0.9 | 1.000 | 0.8 | 0.745 |
| <i>Slc35e4</i>  | 1.8  | 0.451  | 1.3 | 0.794  | 1.2 | 1.000 | 0.9 | 0.988 |
| <i>Slc35f1</i>  | 1.8  | 0.798  | 0.8 | 0.937  | 1.7 | 1.000 | 0.7 | 0.994 |
| <i>Slc35f2</i>  | 1.1  | 0.979  | 1.0 | 0.995  | 0.9 | 1.000 | 0.8 | 0.999 |
| <i>Slc35f3</i>  | 1.0  | 1.000  | 2.3 | 0.532  | 0.8 | 1.000 | 1.8 | 0.917 |
| <i>Slc35f5</i>  | 1.3  | 0.458  | 1.1 | 0.781  | 1.0 | 1.000 | 0.9 | 0.951 |
| <i>Slc35f6</i>  | 1.0  | 0.942  | 1.1 | 0.876  | 1.0 | 1.000 | 1.1 | 0.971 |
| <i>Slc35g1</i>  | 0.9  | 0.742  | 1.0 | 0.946  | 1.1 | 1.000 | 1.2 | 0.876 |
| <i>Slc35g2</i>  | 0.7  | 0.754  | 0.7 | 0.684  | 1.6 | 1.000 | 1.5 | 0.865 |
| <i>Slc36a1</i>  | 2.3  | 0.001  | 2.7 | <0.001 | 0.9 | 1.000 | 1.0 | 1.000 |
| <i>Slc36a2</i>  | 0.1  | 0.266  | 0.8 | 0.915  | 0.9 | 1.000 | 4.6 | 0.756 |
| <i>Slc36a4</i>  | 1.1  | 0.901  | 1.2 | 0.598  | 0.9 | 1.000 | 1.0 | 1.000 |
| <i>Slc37a1</i>  | 11.6 | <0.001 | 6.2 | <0.001 | 1.5 | 1.000 | 0.8 | 0.946 |
| <i>Slc37a2</i>  | 1.2  | 0.832  | 0.7 | 0.424  | 0.8 | 1.000 | 0.5 | 0.350 |
| <i>Slc37a3</i>  | 1.4  | 0.227  | 1.4 | 0.208  | 1.0 | 1.000 | 1.0 | 1.000 |
| <i>Slc37a4</i>  | 0.5  | 0.094  | 0.6 | 0.135  | 1.3 | 1.000 | 1.4 | 0.809 |
| <i>Slc38a1</i>  | 1.0  | 0.988  | 1.3 | 0.605  | 1.1 | 1.000 | 1.3 | 0.835 |
| <i>Slc38a10</i> | 1.3  | 0.351  | 1.6 | 0.062  | 0.8 | 1.000 | 1.0 | 1.000 |
| <i>Slc38a11</i> | 0.5  | 0.595  | 0.7 | 0.791  | 0.9 | 1.000 | 1.3 | 0.991 |
| <i>Slc38a2</i>  | 1.1  | 0.704  | 1.3 | 0.202  | 1.4 | 0.322 | 1.6 | 0.107 |
| <i>Slc38a3</i>  | 0.8  | 0.551  | 0.9 | 0.715  | 1.0 | 1.000 | 1.1 | 0.971 |
| <i>Slc38a4</i>  | 0.3  | <0.001 | 0.3 | <0.001 | 1.1 | 1.000 | 1.2 | 0.951 |
| <i>Slc38a5</i>  | 1.2  | 0.955  | 0.4 | 0.465  | 2.8 | 1.000 | 1.0 | 1.000 |
| <i>Slc38a6</i>  | 0.9  | 0.914  | 0.9 | 0.751  | 1.1 | 1.000 | 1.0 | 1.000 |
| <i>Slc38a7</i>  | 0.7  | 0.149  | 0.9 | 0.609  | 0.9 | 1.000 | 1.1 | 0.945 |
| <i>Slc38a8</i>  | 1.2  | 0.967  | 0.9 | 0.958  | 3.3 | 1.000 | 2.5 | 0.865 |
| <i>Slc38a9</i>  | 1.0  | 0.963  | 0.9 | 0.742  | 1.1 | 1.000 | 0.9 | 0.973 |
| <i>Slc39a1</i>  | 1.0  | 0.998  | 1.2 | 0.507  | 0.9 | 1.000 | 1.1 | 0.965 |
| <i>Slc39a10</i> | 1.3  | 0.439  | 0.7 | 0.344  | 1.4 | 1.000 | 0.7 | 0.722 |
| <i>Slc39a11</i> | 1.4  | 0.180  | 2.0 | <0.001 | 0.9 | 1.000 | 1.3 | 0.626 |
| <i>Slc39a13</i> | 1.1  | 0.728  | 1.1 | 0.853  | 1.0 | 1.000 | 1.0 | 1.000 |
| <i>Slc39a14</i> | 2.3  | 0.013  | 2.1 | 0.022  | 1.5 | 0.978 | 1.4 | 0.775 |
| <i>Slc39a2</i>  | 0.6  | 0.522  | 0.5 | 0.208  | 1.1 | 1.000 | 0.9 | 0.988 |
| <i>Slc39a3</i>  | 1.1  | 0.749  | 1.0 | 0.877  | 0.9 | 1.000 | 0.9 | 0.794 |
| <i>Slc39a4</i>  | 0.9  | 0.817  | 0.7 | 0.358  | 0.8 | 1.000 | 0.6 | 0.603 |
| <i>Slc39a5</i>  | 1.5  | 0.680  | 1.2 | 0.878  | 1.1 | 1.000 | 0.9 | 0.998 |
| <i>Slc39a6</i>  | 1.0  | 0.990  | 1.0 | 1.000  | 1.3 | 1.000 | 1.3 | 0.843 |

|                 |      |        |      |        |     |       |     |       |
|-----------------|------|--------|------|--------|-----|-------|-----|-------|
| <i>Slc39a7</i>  | 1.1  | 0.762  | 1.2  | 0.461  | 0.9 | 1.000 | 0.9 | 0.975 |
| <i>Slc39a8</i>  | 1.0  | 0.996  | 1.1  | 0.817  | 1.0 | 1.000 | 1.2 | 0.949 |
| <i>Slc39a9</i>  | 1.1  | 0.707  | 1.2  | 0.579  | 1.0 | 1.000 | 1.1 | 0.978 |
| <i>Slc3a1</i>   | 1.0  | 1.000  | 1.8  | 0.469  | 0.7 | 1.000 | 1.2 | 0.985 |
| <i>Slc3a2</i>   | 0.8  | 0.448  | 0.9  | 0.719  | 1.0 | 1.000 | 1.1 | 0.936 |
| <i>Slc40a1</i>  | 1.5  | 0.292  | 1.6  | 0.180  | 0.7 | 1.000 | 0.8 | 0.837 |
| <i>Slc41a1</i>  | 1.0  | 0.997  | 1.2  | 0.671  | 0.7 | 1.000 | 0.9 | 0.943 |
| <i>Slc41a2</i>  | 30.2 | <0.001 | 28.1 | <0.001 | 1.1 | 1.000 | 1.0 | 1.000 |
| <i>Slc41a3</i>  | 4.3  | 0.001  | 3.5  | 0.002  | 1.9 | 0.781 | 1.5 | 0.753 |
| <i>Slc43a1</i>  | 2.6  | 0.037  | 3.1  | 0.010  | 1.1 | 1.000 | 1.3 | 0.934 |
| <i>Slc43a2</i>  | 1.1  | 0.895  | 1.0  | 0.982  | 0.9 | 1.000 | 0.9 | 0.967 |
| <i>Slc43a3</i>  | 0.8  | 0.493  | 0.8  | 0.334  | 1.0 | 1.000 | 0.9 | 0.962 |
| <i>Slc44a1</i>  | 1.1  | 0.751  | 1.2  | 0.425  | 0.9 | 1.000 | 1.0 | 1.000 |
| <i>Slc44a2</i>  | 0.9  | 0.721  | 0.8  | 0.477  | 1.0 | 1.000 | 0.9 | 0.943 |
| <i>Slc44a3</i>  | 0.9  | 0.908  | 0.6  | 0.416  | 0.9 | 1.000 | 0.7 | 0.803 |
| <i>Slc44a4</i>  | 0.6  | 0.844  | 2.6  | 0.389  | 1.6 | 1.000 | 6.9 | 0.404 |
| <i>Slc45a3</i>  | 3.0  | 0.001  | 2.1  | 0.027  | 1.2 | 1.000 | 0.9 | 0.948 |
| <i>Slc45a4</i>  | 1.2  | 0.706  | 1.4  | 0.343  | 0.7 | 1.000 | 0.8 | 0.912 |
| <i>Slc46a1</i>  | 0.9  | 0.608  | 1.1  | 0.570  | 0.7 | 0.593 | 1.0 | 0.995 |
| <i>Slc46a3</i>  | 0.5  | 0.090  | 0.9  | 0.866  | 0.7 | 1.000 | 1.4 | 0.844 |
| <i>Slc47a1</i>  | 0.9  | 0.922  | 1.0  | 0.975  | 0.9 | 1.000 | 1.0 | 1.000 |
| <i>Slc48a1</i>  | 1.1  | 0.749  | 1.0  | 1.000  | 1.0 | 1.000 | 0.9 | 0.914 |
| <i>Slc4a1</i>   | 8.0  | 0.002  | 24.0 | <0.001 | 0.9 | 1.000 | 2.6 | 0.415 |
| <i>Slc4a11</i>  | 0.6  | 0.755  | 0.6  | 0.742  | 0.6 | 1.000 | 0.6 | 0.944 |
| <i>Slc4a1ap</i> | 0.8  | 0.268  | 0.7  | 0.074  | 1.0 | 1.000 | 0.9 | 0.869 |
| <i>Slc4a2</i>   | 0.9  | 0.818  | 0.8  | 0.433  | 1.0 | 1.000 | 0.9 | 0.938 |
| <i>Slc4a3</i>   | 0.6  | 0.469  | 0.9  | 0.856  | 0.9 | 1.000 | 1.3 | 0.930 |
| <i>Slc4a4</i>   | 0.7  | 0.439  | 0.8  | 0.517  | 1.1 | 1.000 | 1.1 | 0.967 |
| <i>Slc4a5</i>   | 1.3  | 0.926  | 0.3  | 0.436  | 2.9 | 1.000 | 0.6 | 0.984 |
| <i>Slc4a7</i>   | 1.1  | 0.862  | 1.1  | 0.699  | 1.0 | 1.000 | 1.1 | 0.982 |
| <i>Slc4a8</i>   | 1.1  | 0.978  | 0.3  | 0.272  | 0.9 | 1.000 | 0.3 | 0.557 |
| <i>Slc4a9</i>   | 0.1  | 0.025  | 0.1  | 0.001  | 3.9 | 0.359 | 1.9 | 0.914 |
| <i>Slc50a1</i>  | 0.6  | 0.144  | 0.8  | 0.703  | 0.9 | 1.000 | 1.3 | 0.816 |
| <i>Slc51a</i>   | 0.3  | 0.381  | 0.3  | 0.424  | 0.4 | 1.000 | 0.4 | 0.795 |
| <i>Slc51b</i>   | 1.4  | 0.835  | 0.9  | 0.943  | 0.8 | 1.000 | 0.5 | 0.820 |
| <i>Slc52a2</i>  | 0.6  | 0.178  | 0.6  | 0.112  | 0.8 | 1.000 | 0.7 | 0.762 |
| <i>Slc52a3</i>  | 0.9  | 0.931  | 1.6  | 0.605  | 1.1 | 1.000 | 2.0 | 0.762 |
| <i>Slc5a1</i>   | 0.6  | 0.551  | 0.8  | 0.856  | 1.1 | 1.000 | 1.6 | 0.897 |
| <i>Slc5a11</i>  | 0.5  | 0.758  | 0.5  | 0.734  | 0.4 | 1.000 | 0.3 | 0.868 |
| <i>Slc5a3</i>   | 1.2  | 0.779  | 0.9  | 0.861  | 1.1 | 1.000 | 0.8 | 0.949 |
| <i>Slc5a4b</i>  | 0.7  | 0.821  | 0.9  | 0.966  | 1.2 | 1.000 | 1.7 | 0.938 |
| <i>Slc5a5</i>   | 1.8  | 0.786  | 2.1  | 0.703  | 0.6 | 1.000 | 0.7 | 0.999 |
| <i>Slc5a6</i>   | 0.5  | 0.130  | 0.6  | 0.166  | 1.2 | 1.000 | 1.3 | 0.912 |
| <i>Slc5a9</i>   | 8.5  | 0.247  | 0.4  | 0.685  | 8.4 | 0.908 | 0.4 | 0.912 |
| <i>Slc6a1</i>   | 2.1  | 0.629  | 0.9  | 0.971  | 0.7 | 1.000 | 0.3 | 0.739 |
| <i>Slc6a12</i>  | 1.1  | 0.952  | 1.6  | 0.137  | 0.9 | 1.000 | 1.4 | 0.718 |
| <i>Slc6a13</i>  | 0.8  | 0.699  | 0.9  | 0.818  | 0.9 | 1.000 | 1.0 | 1.000 |
| <i>Slc6a14</i>  | 0.5  | 0.769  | 3.5  | 0.348  | 0.8 | 1.000 | 5.4 | 0.575 |

|                 |     |        |      |        |     |       |      |       |
|-----------------|-----|--------|------|--------|-----|-------|------|-------|
| <i>Slc6a15</i>  | 0.5 | 0.809  | 1.1  | 0.997  | 0.5 | 1.000 | 1.2  | 1.000 |
| <i>Slc6a16</i>  | 0.3 | 0.253  | 0.4  | 0.249  | 1.4 | 1.000 | 1.5  | 0.941 |
| <i>Slc6a17</i>  | 0.9 | 0.993  | 0.6  | 0.731  | 2.4 | 1.000 | 1.5  | 0.978 |
| <i>Slc6a18</i>  | 2.9 | 0.637  | 7.4  | 0.293  | 1.0 | 1.000 | 2.6  | 0.901 |
| <i>Slc6a19</i>  | 0.1 | 0.369  | 0.2  | 0.320  | 1.6 | 1.000 | 2.0  | 0.975 |
| <i>Slc6a2</i>   | 4.6 | 0.452  | 0.9  | 0.953  | 6.0 | 0.979 | 1.1  | 1.000 |
| <i>Slc6a20b</i> | 1.6 | 0.646  | 0.6  | 0.525  | 1.5 | 1.000 | 0.6  | 0.799 |
| <i>Slc6a4</i>   | 1.8 | 0.513  | 1.4  | 0.783  | 0.6 | 1.000 | 0.5  | 0.744 |
| <i>Slc6a6</i>   | 1.2 | 0.713  | 1.6  | 0.159  | 0.8 | 1.000 | 1.0  | 1.000 |
| <i>Slc6a8</i>   | 0.9 | 0.836  | 1.3  | 0.616  | 0.9 | 1.000 | 1.4  | 0.856 |
| <i>Slc6a9</i>   | 6.1 | <0.001 | 9.0  | <0.001 | 0.7 | 1.000 | 1.1  | 1.000 |
| <i>Slc7a1</i>   | 1.4 | 0.606  | 1.1  | 0.915  | 1.6 | 1.000 | 1.2  | 0.956 |
| <i>Slc7a10</i>  | 0.3 | 0.619  | 0.4  | 0.559  | 2.8 | 1.000 | 4.4  | 0.763 |
| <i>Slc7a11</i>  | 2.0 | 0.478  | 1.2  | 0.861  | 2.2 | 1.000 | 1.4  | 0.950 |
| <i>Slc7a14</i>  | 0.6 | 0.680  | 0.3  | 0.273  | 1.5 | 1.000 | 0.7  | 0.978 |
| <i>Slc7a15</i>  | 5.0 | 0.102  | 19.1 | 0.010  | 0.1 | 0.554 | 0.4  | 0.786 |
| <i>Slc7a2</i>   | 0.4 | 0.013  | 0.5  | 0.058  | 1.3 | 1.000 | 1.6  | 0.625 |
| <i>Slc7a3</i>   | 1.8 | 0.779  | 0.6  | 0.776  | 2.5 | 1.000 | 0.8  | 1.000 |
| <i>Slc7a4</i>   | 1.1 | 0.933  | 1.0  | 1.000  | 0.9 | 1.000 | 0.8  | 0.971 |
| <i>Slc7a5</i>   | 0.8 | 0.833  | 0.9  | 0.848  | 1.1 | 1.000 | 1.2  | 0.969 |
| <i>Slc7a6</i>   | 0.5 | 0.451  | 2.3  | 0.214  | 1.0 | 1.000 | 4.6  | 0.262 |
| <i>Slc7a6os</i> | 0.9 | 0.658  | 0.8  | 0.243  | 1.0 | 1.000 | 0.9  | 0.947 |
| <i>Slc7a7</i>   | 5.0 | <0.001 | 2.9  | 0.003  | 1.1 | 1.000 | 0.6  | 0.601 |
| <i>Slc7a8</i>   | 1.6 | 0.380  | 1.3  | 0.649  | 0.9 | 1.000 | 0.7  | 0.841 |
| <i>Slc7a9</i>   | 8.0 | 0.255  | 14.3 | 0.138  | 0.6 | 1.000 | 1.1  | 1.000 |
| <i>Slc8a1</i>   | 3.1 | 0.236  | 2.1  | 0.486  | 0.7 | 1.000 | 0.5  | 0.803 |
| <i>Slc8b1</i>   | 0.5 | 0.023  | 0.6  | 0.055  | 0.8 | 1.000 | 0.9  | 0.958 |
| <i>Slc9a1</i>   | 0.9 | 0.792  | 0.8  | 0.421  | 1.1 | 1.000 | 1.0  | 1.000 |
| <i>Slc9a2</i>   | 0.8 | 0.965  | 13.0 | 0.056  | 0.3 | 1.000 | 4.9  | 0.575 |
| <i>Slc9a3</i>   | 0.4 | 0.766  | 74.3 | 0.005  | 0.1 | 1.000 | 23.5 | 0.238 |
| <i>Slc9a3r1</i> | 0.6 | 0.055  | 0.7  | 0.229  | 0.9 | 1.000 | 1.1  | 0.951 |
| <i>Slc9a3r2</i> | 0.6 | 0.067  | 0.6  | 0.102  | 0.9 | 1.000 | 1.0  | 1.000 |
| <i>Slc9a5</i>   | 1.0 | 0.998  | 0.7  | 0.518  | 1.2 | 1.000 | 0.8  | 0.951 |
| <i>Slc9a6</i>   | 1.1 | 0.872  | 1.0  | 1.000  | 1.0 | 1.000 | 0.9  | 0.997 |
| <i>Slc9a7</i>   | 1.7 | 0.429  | 2.3  | 0.141  | 0.6 | 1.000 | 0.9  | 0.979 |
| <i>Slc9a8</i>   | 0.7 | 0.197  | 0.8  | 0.267  | 0.9 | 1.000 | 0.9  | 0.943 |
| <i>Slc9a9</i>   | 1.3 | 0.567  | 1.1  | 0.861  | 0.9 | 1.000 | 0.8  | 0.855 |
| <i>Slc9b1</i>   | 3.2 | 0.335  | 5.5  | 0.152  | 0.5 | 1.000 | 0.8  | 1.000 |
| <i>Slc9b2</i>   | 1.3 | 0.734  | 1.2  | 0.795  | 1.1 | 1.000 | 1.0  | 1.000 |
| <i>Slco1a1</i>  | 1.6 | 0.585  | 2.0  | 0.319  | 0.5 | 1.000 | 0.6  | 0.856 |
| <i>Slco1a4</i>  | 0.4 | 0.045  | 0.4  | 0.063  | 1.1 | 1.000 | 1.2  | 0.945 |
| <i>Slco1a6</i>  | 3.9 | 0.339  | 5.1  | 0.192  | 0.9 | 1.000 | 1.2  | 1.000 |
| <i>Slco1b2</i>  | 0.5 | 0.316  | 0.6  | 0.375  | 1.1 | 1.000 | 1.2  | 0.964 |
| <i>Slco2a1</i>  | 1.1 | 0.883  | 1.3  | 0.562  | 0.9 | 1.000 | 1.0  | 1.000 |
| <i>Slco2b1</i>  | 0.9 | 0.806  | 1.1  | 0.859  | 1.0 | 1.000 | 1.2  | 0.869 |
| <i>Slco3a1</i>  | 1.0 | 0.983  | 0.8  | 0.635  | 1.0 | 1.000 | 0.8  | 0.894 |
| <i>Slco4a1</i>  | 0.5 | 0.475  | 0.6  | 0.524  | 1.1 | 1.000 | 1.3  | 0.976 |
| <i>Slco4c1</i>  | 4.8 | 0.519  | 17.8 | 0.035  | 2.6 | 1.000 | 9.6  | 0.376 |

|                |     |       |     |       |     |       |     |       |
|----------------|-----|-------|-----|-------|-----|-------|-----|-------|
| <i>Slco5a1</i> | 1.8 | 0.479 | 0.3 | 0.180 | 2.1 | 0.982 | 0.4 | 0.636 |
|----------------|-----|-------|-----|-------|-----|-------|-----|-------|

**Supplemental Table S3. Plasma concentrations of bile acids in CVNP, CVP, GFNP, and GFP female C57BL/6 mice. Data shown are means  $\pm$  SD of 5-6 mice.**

| Bile Acids                  | Plasma Concentration (ng/ml) |                     |                       |                    |
|-----------------------------|------------------------------|---------------------|-----------------------|--------------------|
|                             | CVNP                         | CVP                 | GFNP                  | GFP                |
| <b>Primary Bile Acids</b>   |                              |                     |                       |                    |
| $\alpha$ -MCA               | 108.2 $\pm$ 78.4             | 714.2 $\pm$ 880.9   | 13 $\pm$ 17.7         | 7.7 $\pm$ 7.8      |
| T- $\alpha$ -MCA            | 25.6 $\pm$ 4.4               | 465.7 $\pm$ 850.9   | 3550.7 $\pm$ 6505.9   | 998.5 $\pm$ 1451.9 |
| $\beta$ -MCA                | 340.5 $\pm$ 379.4            | 1112.7 $\pm$ 844.1  | 140.8 $\pm$ 175.5     | 65.7 $\pm$ 53.3    |
| T- $\beta$ -MCA             | 36.7 $\pm$ 17.7              | 2674.4 $\pm$ 5832.7 | 22884.7 $\pm$ 31772.6 | 9222.2 $\pm$ 10750 |
| CA                          | 393 $\pm$ 269.8              | 5678.6 $\pm$ 7628.4 | 49.6 $\pm$ 22.2       | 37.3 $\pm$ 4       |
| CDCA                        | 148.4 $\pm$ 36.3             | 892.2 $\pm$ 921.5   | 128.8 $\pm$ 52.1      | 100 $\pm$ 4.7      |
| TCA                         | 173.5 $\pm$ 85.8             | 2483.7 $\pm$ 4355.4 | 9636.8 $\pm$ 15368.9  | 3312 $\pm$ 5091.4  |
| TCDCa                       | 15.2 $\pm$ 5.5               | 60.5 $\pm$ 85.4     | 1081.5 $\pm$ 2185.7   | 244.4 $\pm$ 378.9  |
| UDCA                        | 68.2 $\pm$ 52                | 688.7 $\pm$ 762     | 3.3 $\pm$ 6           | 1.8 $\pm$ 2.3      |
| TUDCA                       | 14.7 $\pm$ 4.4               | 81.5 $\pm$ 149.2    | 797.1 $\pm$ 1651.7    | 268.3 $\pm$ 487    |
| <b>Secondary Bile Acids</b> |                              |                     |                       |                    |
| $\omega$ -MCA               | 351.5 $\pm$ 293.7            | 2101 $\pm$ 1967     | 0.1 $\pm$ 0           | 0.1 $\pm$ 0        |
| T- $\omega$ -MCA            | 334.6 $\pm$ 104.4            | 2897.7 $\pm$ 5149.8 | 0.1 $\pm$ 0           | 0.1 $\pm$ 0        |
| DCA                         | 70.9 $\pm$ 69.7              | 478.1 $\pm$ 440.4   | 3.6 $\pm$ 7.3         | 6.3 $\pm$ 13.8     |
| TDCA                        | 46.2 $\pm$ 31.5              | 38 $\pm$ 16.6       | 1.7 $\pm$ 0           | 1.7 $\pm$ 0        |
| MDCA                        | 47.5 $\pm$ 4.2               | 80 $\pm$ 41         | 43.7 $\pm$ 0.6        | 43.5 $\pm$ 0.6     |
| HDCA                        | 225.8 $\pm$ 54.9             | 2037.8 $\pm$ 1492.2 | 29 $\pm$ 24.1         | 8 $\pm$ 6.1        |
| THDCA                       | 27.2 $\pm$ 10.2              | 86 $\pm$ 89.8       | 64.9 $\pm$ 67.2       | 31.1 $\pm$ 29.3    |
| LCA                         | 81.9 $\pm$ 33.8              | 160 $\pm$ 119.4     | 10.4 $\pm$ 9.1        | 1.9 $\pm$ 4        |
| TLCA                        | 19 $\pm$ 21.6                | 94.1 $\pm$ 117.3    | 8.3 $\pm$ 20.1        | 0.1 $\pm$ 0        |

**Supplemental Table S4. Plasma concentrations of steroid hormones in CVNP, CVP, GFNP, and GFP female C57BL/6 mice. Data shown are means  $\pm$  SD of 5-6 mice.**

| Steroid Hormones       | Plasma Concentration (ng/ml) |                     |                   |                     |
|------------------------|------------------------------|---------------------|-------------------|---------------------|
|                        | CVNP                         | CVP                 | GFNP              | GFP                 |
| 11-deoxycorticosterone | 43.5 $\pm$ 10.5              | 197.7 $\pm$ 100     | 107.8 $\pm$ 45.4  | 396.2 $\pm$ 112.7   |
| 17-OH-pregnenolone     | 621 $\pm$ 211                | 3329.6 $\pm$ 1731.1 | 910.1 $\pm$ 247.4 | 6186.2 $\pm$ 1770.4 |
| 17-OH-progesterone     | 43.4 $\pm$ 11.5              | 198.4 $\pm$ 106.9   | 112.5 $\pm$ 37.8  | 419.9 $\pm$ 129.4   |
| Aldosterone            | 0.1 $\pm$ 0                  | 1.7 $\pm$ 2.7       | 0.7 $\pm$ 1.5     | 10.3 $\pm$ 3.5      |
| Corticosterone         | 693.4 $\pm$ 214.1            | 4089 $\pm$ 2135.5   | 1201 $\pm$ 252.4  | 7562.3 $\pm$ 2327.3 |
| Cortisol               | 46.1 $\pm$ 19.7              | 1247.6 $\pm$ 741.7  | 80.8 $\pm$ 34.3   | 1749 $\pm$ 427.5    |
| Cortisone              | 0.1 $\pm$ 0                  | 6 $\pm$ 5.8         | 0.1 $\pm$ 0       | 7.4 $\pm$ 3.5       |
| DHEA                   | 2.3 $\pm$ 2.8                | 1.3 $\pm$ 1.3       | 0.3 $\pm$ 0.3     | 0.1 $\pm$ 0         |
| Estradiol              | 67.8 $\pm$ 37.1              | 30.9 $\pm$ 10.1     | 65.3 $\pm$ 66.2   | 124.5 $\pm$ 128     |
| Estrone                | 23 $\pm$ 19.2                | 8.6 $\pm$ 10.4      | 28.9 $\pm$ 53     | 20.4 $\pm$ 20.8     |
| Pregnenolone           | 0.1 $\pm$ 0                  | 2.5 $\pm$ 4.5       | 1.4 $\pm$ 2.4     | 6.7 $\pm$ 4.8       |
| Progesterone           | 18.6 $\pm$ 15.7              | 577.2 $\pm$ 235.8   | 28.7 $\pm$ 47.3   | 458.5 $\pm$ 192.3   |
| Testosterone           | 0.1 $\pm$ 0                  | 0.1 $\pm$ 0         | 0.1 $\pm$ 0       | 0.1 $\pm$ 0         |
